# Supplementary material for: A Combination of M50I and V151I Polymorphic Mutations in HIV-1 Subtype B Integrase Results in Defects in Autoprocessing
Source: MDPI journal article supplement (doi:10.3390/v13112331), 2021-11-22
Supplement: s1 [file s1]

**Table S3. A profile of sequence samples containing IN:M50I alone**

| Pt. ID <sup>1</sup> | Seq. ID <sup>3</sup> | Regimen <sup>2</sup>             | Sample <sup>4</sup> | Blood Date <sup>6</sup> | VL <sup>5</sup> | Start Date <sup>7</sup>       | End Date <sup>8</sup>        | DOSE                                |                |
|---------------------|----------------------|----------------------------------|---------------------|-------------------------|-----------------|-------------------------------|------------------------------|-------------------------------------|----------------|
| P1                  | <b>1</b>             | ABC/DTG/LAV                      | Pre                 | 4/28/17                 | 201353          | 5/8/17                        |                              | 1 tab                               | Daily          |
| P2                  | <b>2</b>             | FTC/TFV-DF                       | Post                | 6/8/17                  | 50449           | 12/1/08                       | 1/1/15                       | 100 mg/150 mg                       | Daily          |
|                     |                      | RAL                              |                     |                         |                 | 12/1/08                       | 11/1/14                      | <b>400 mg</b>                       | <b>BID</b>     |
|                     | <b>3</b>             | DTG                              | Pre                 | 7/6/17                  | 19832           | 11/1/14                       | 1/1/15                       | <b>50 mg</b>                        | <b>Daily</b>   |
|                     |                      | ABC/DTG/LAV                      |                     |                         |                 | 1/1/15                        | 5/11/17                      | <b>300 mg/600 mg/50 r</b>           | <b>Daily</b>   |
|                     | <b>4</b>             | ABC/DTG/LAV<br>FTC/TFV-DF<br>DTG | Post                | 3/28/19                 | 12755           | 7/10/17<br>7/10/17<br>7/10/17 | 3/3/19<br>7/10/17<br>7/10/17 | 300 mg/600 mg/50 r<br>100 mg/150 mg | Daily<br>Daily |
| P3                  | <b>5</b>             | ABC/DTG/LAV                      | Pre                 | 4/10/19                 | 26508           | 4/17/19                       |                              | 300 mg/600 mg/50 r                  | Daily          |
|                     | <b>6</b>             | Never on ART                     | Pre                 | 9/21/17                 | 2044            |                               |                              |                                     |                |
| P4                  | <b>7</b>             | BIC/TFV-AF/EM                    | On                  | 12/11/18                | 51922           | 12/3/18                       |                              | <b>1 tab</b>                        | <b>Daily</b>   |
| P5                  | <b>8</b>             | Never on ART                     | Pre                 | 3/14/18                 | 7261            |                               |                              |                                     |                |
| P6                  | <b>9</b>             | ZDV                              | On                  | 11/28/17                | 1207            | 10/31/01                      | 4/1/02                       | 300 mg                              | bid            |
|                     |                      | LAV                              |                     |                         |                 | 10/31/01                      | 4/1/02                       | 150 mg                              | bid            |
|                     | <b>10</b>            | EFV                              | Pre                 | 3/27/18                 | 2886            | 10/31/01                      | 4/1/02                       | 600 mg                              | At bedtime     |
|                     |                      | STV                              |                     |                         |                 | 6/7/02                        | 6/1/04                       | 40 mg                               | bid            |
|                     | <b>11</b>            | NFV                              | On                  | 6/8/10                  |                 | 6/7/02                        | 6/1/04                       | 1250 mg                             | bid            |
| P7                  | <b>12</b>            | LPV/r                            | On                  | 11/28/17                | 1207            | 3/13/07                       | 6/8/10                       | 400mg/100mg                         | BID            |
|                     |                      | FTC/TFV-DF                       |                     |                         |                 | 3/13/07                       | 3/29/17                      | 200mg/ 300mg                        | daily          |
|                     | <b>13</b>            | AZV                              | On                  | 11/28/17                | 1207            | 6/8/10                        | 3/29/17                      | 300mg                               | Daily          |
|                     |                      | RTV                              |                     |                         |                 | 6/8/10                        | 3/29/17                      | 100mg                               | Daily          |
|                     | <b>14</b>            | EGV/COB/TAF/FTC                  | On                  | 11/28/17                | 1207            | 3/30/17                       | 6/14/18                      | 1 tablet                            | Daily          |
| P8*                 | <b>10</b>            | BIC/TFV-AF/FTC                   | Pre                 | 3/27/18                 | 2886            | 6/14/18                       |                              | 1 tablet                            | Daily          |
|                     | <b>11</b>            | EFV/FTC/TVF-DF                   | Pre                 | 7/24/07                 | 52594           | 10/28/09                      |                              | 1 tablet                            | Daily          |
|                     | <b>12</b>            |                                  | Pre                 | 11/28/17                | 3016            |                               |                              |                                     |                |
|                     | <b>13</b>            |                                  | Pre                 | 5/2/18                  | 1502            |                               |                              |                                     |                |
|                     | <b>14</b>            | ABC/DTG/LAV<br>ABC/DTG/LAV       | Pre                 | 11/14/18                | 1262            | 2/21/19<br>1/10/20            | 10/1/19                      | 1 tablet<br>1 tablet                | Daily<br>Daily |

1: Patients ID #

2: Sequence ID

3: Regimens, ABC: abacavir, AZV: Atazanavir, BIC: Bictegravir, COB: Cobicistat, DTG: dolutegravir, EFV: Efavirenz, EGV: Elvitegravir, FTC: Emtricitabine, LAV: lamivudine, LPV/r: Lopinavir/ritonavir, NFV: Nelfinavir, TFV-AF: tenofovir AF, TFV-DF: Tenofovir DF, RAL: Raltegravir, RTV: Ritonavir, STV: Stavudine, ZDV: Zidovudine

4: Status of the blood samples as Pre, Post, or ON therapy when collecting blood

5: Date of blood collection

6: Viral load, HIV RNA copy number (copies/ml)

7: Started date of new therapy

8: End of date of the therapy

\*: The patient initially came to the NIAID clinic under the Long Term Non-Progressor protocol and moved to viremic patients under ART from 2019.
