# Supplementary material for: A Combination of M50I and V151I Polymorphic Mutations in HIV-1 Subtype B Integrase Results in Defects in Autoprocessing
Source: MDPI journal article supplement (doi:10.3390/v13112331), 2021-11-22
Supplement: s1 [file s1]

Table S2: Primer sequences

| Primers 5'-3'                      |                                                           |
|------------------------------------|-----------------------------------------------------------|
| E+ Primer Set *                    |                                                           |
| <b>Forward primer (HIV737U)</b>    | 5' -GCGRCTGGTGAGTACGCC-3'                                 |
| <b>Reverse primer (GSM_5219_R)</b> | 5' -CCTAGTGGGATGTGTACTTCTGAAC-3'                          |
| A4.5kb Primer Set                  |                                                           |
| <b>Forward primer (GSM_682_F)</b>  | 5' -TCTCTCGACGCAGGACTCG-3'                                |
| <b>Reverse primer (rt-in-2-R)</b>  | 5' -CCTAGTGGGATGTGTACTTCTGAACTTA-3'                       |
| Point Mutagenesis Primers          |                                                           |
| <b>I151V S</b>                     | 5' -<br>CAATCCCCAAAGTCAAGGAGTAGTAGAATCTATGAATAAAG-<br>3'  |
| <b>I151V AS</b>                    | 5' -<br>CTTTATTTCATAGATTCTACTACTCCTTGACTTTGGGGATTG-<br>3' |

\*: primer sequences for RT-PCR
