# Supplementary material for: A Combination of M50I and V151I Polymorphic Mutations in HIV-1 Subtype B Integrase Results in Defects in Autoprocessing
Source: MDPI journal article supplement (doi:10.3390/v13112331), 2021-11-22
Supplement: s1 [file s1]

## Original WB result of Figure 3C

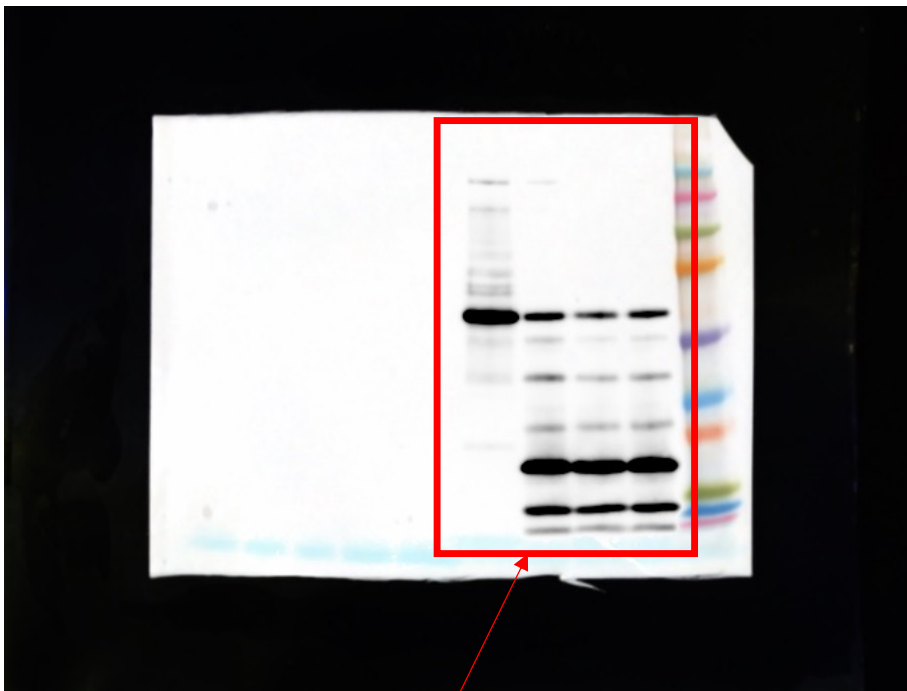

We used this area in Figure 3C of the manuscript, after the image was horizontally flipped.
