# Supplementary material for: A Combination of M50I and V151I Polymorphic Mutations in HIV-1 Subtype B Integrase Results in Defects in Autoprocessing
Source: MDPI journal article supplement (doi:10.3390/v13112331), 2021-11-22
Supplement: s1 [file s1]

**Table S4. Summary of p24 concentration in HIV Stocks**

| Phenotype * | p24 ( $\mu\text{g/mL}$ ) ** | % † | p value ‡ |
|-------------|-----------------------------|-----|-----------|
| WT          | 110.0 $\pm$ 22.7            | 100 | N/A       |
| M50I        | 93.5 $\pm$ 30.2             | 85  | p>0.05    |
| V151I       | 118.3 $\pm$ 38.9            | 107 | p>0.05    |
| M50I/V151I  | 0.3 $\pm$ 0.1               | 0.3 | P<0.01    |

\*: Phenotype of HIV Stock; WT: wild type HIV, M50I: HIV carrying IN:M50I, V151I: HIV carrying IN:V151I, M50I/V151I: HIV carrying IN:M50I/V151I.

\*\*: p24 concentrations in HIV stocks. Data indicates Means  $\pm$  SE, (n=4).

†: Percentage of stock concentration of each stock compared to that of WT

‡: p value from unpaired Student *t* test of each stock compared to WT.
