# Supplementary material for: A Combination of M50I and V151I Polymorphic Mutations in HIV-1 Subtype B Integrase Results in Defects in Autoprocessing
Source: MDPI journal article supplement (doi:10.3390/v13112331), 2021-11-22
Supplement: s1 [file s1]

**Table S1. Samples profiles of HIV sequence**

| Sequence Time Points * | Pt No ** | Sample No § |
|------------------------|----------|-------------|
| 1                      | 84       | 84          |
| 2                      | 56       | 112         |
| 3                      | 25       | 75          |
| 4                      | 15       | 60          |
| 5                      | 11       | 55          |
| 6                      | 7        | 42          |
| 7                      | 3        | 21          |
| 8                      | 2        | 16          |
| 9                      | 2        | 18          |
| 10                     | 1        | 10          |
| 11                     | 2        | 22          |
| 14                     | 1        | 14          |
| <b>Grand Total</b>     | 209      | 529         |

\*: Frequency of sequence.

\*\*: Patient numbers. All patients had >1000 copies /mL of viral load in plasma when sequence analysis was conducted, and none of HIV contained IN resistant mutations prior to IN inhibitor therapies.

§: Number of sequenced samples per frequency.
