# Supplementary material for: A Combination of M50I and V151I Polymorphic Mutations in HIV-1 Subtype B Integrase Results in Defects in Autoprocessing
Source: MDPI journal article supplement (doi:10.3390/v13112331), 2021-11-22
Supplement: s1 [file s1]

**Figure S1**

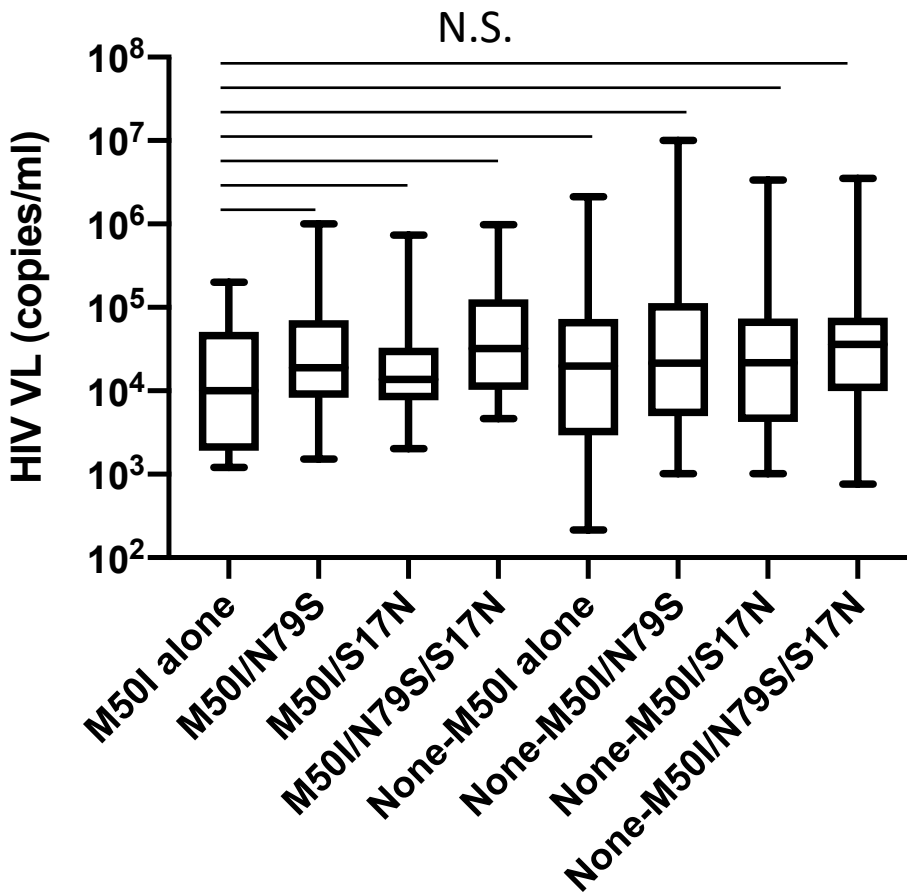

**Figure S1. Statistical analysis among VL and mutations**

To determine whether virus load (VL) in plasma and detected virus variants have a significant difference or not, we conducted the one-way ANOVA test between M50I alone and other combinations of mutations using a total of 529 samples.

None of the combinations showed significant differences in VL distribution with M50I mutation. N.S.: not significant ( $p > 0.05$ )
