# Supplementary material for: A Combination of M50I and V151I Polymorphic Mutations in HIV-1 Subtype B Integrase Results in Defects in Autoprocessing
Source: Viruses. 2021 Nov 22;13(11):2331. doi: 10.3390/v13112331 (PMC8625782; doi:10.3390/v13112331)
Supplement: Supplementary file 1 [file viruses-13-02331-s001.zip]

Archive with 8 entries (8 files):
- Figure S1.pdf
- Figure S2.pdf
- gel image.pdf
- S. materials_S.Method_tif.jpg
- sub.Modi.Table S3.pdf
- Table S1.Samples profiles of HIV sequence.pdf
- Table S2_exS1.pdf
- Table S4.Profiles of p24 concentration in HIV Stocks.pdf
